# Supplementary material
Source: PubMed Central journal article supplement (PMC5574045)
Supplement: MCB.00579-16_zmb018171585s1.pdf [file MCB.00579-16_zmb018171585s1.pdf]

# **DeSUMOylation of Gli1 by SENP1 attenuates Sonic hedgehog signaling**

Huaize liu\*, Sen Yan\*, Jie Ding, Ting-ting Yu<sup>¶</sup> and Steven Y. Cheng<sup>¶</sup>

Department of Developmental Genetics, School of Basic Medical Sciences, Nanjing  
Medical University, 101 Longmian Avenue, Nanjing, Jiangsu 211166, China

\* These two authors contributed equally.

¶ Correspondence should be addressed to [sycheng@njmu.edu.cn](mailto:sycheng@njmu.edu.cn) and  
[tingting@njmu.edu.cn](mailto:tingting@njmu.edu.cn)

## **SUPPLEMENTARY INFORMATION**

## **SUPPLEMENTARY FIGURE LEGENDS**

**Figure S1 Knockdown efficiency of each SENP.** Data are presented as means  $\pm$ SD of three independent experiments. Student T test was used for statistical analysis, \*  $P < 0.05$ , \*\* $P < 0.01$ .

**Figure S2 Proximity Ligation Assay of different mutant towards the 3 potential SUMO modifying sites.** (A) Proximity Ligation Assay (PLA), a method through which we can detect the conjunction between the substrate protein and the modifier, SUMO1. The red signal requires a quite closely distance of two proteins identified by two kinds of antibodies respectively. We transfected 8 kinds of different lysine-mutant Gli1 which tagged by HA into SENP1<sup>-/-</sup>MEFs, and detected the red signal with anti-HA and anti-SUMO1 antibodies to ensure the presence and localization of SUMO1-modified Gli1. Except for the HA-Gli1 with full of modification and HA-Gli1-3KR without any modification at all, the other 6 mutants showed an indistinctive limited modification, indicating that all the three lysine residues could be modified and there is no dominant one. The PLA signals are quantified in (B).

**Figure S3 Gli1 Ubiquitination also happens on the 3 SUMOylation lysine residues.** (A) Western analysis and (B) quantification of ubiquitinated HA-Gli1 or HA-Gli1-3KR. HEK293T cells were transfected with HIS-ubiquitin, and HA-Gli1 or HA-Gli1-3KR. The cells were treated with MG132 (20 $\mu$ M) for 6 hours prior to harvesting for immunoprecipitation using anti-HA antibodies. Student T test was used

for statistical analysis, \*\* P<0.01.

**Figure S4 HA-Gli1 and HA-Gli1-3KR show different cellular localization. (A)**

Immunofluorescence assay shows the localization of different Gli1. HA-Gli1 or HA-Gli1-3KR is transfected into SENP1<sup>-/-</sup> or SENP1<sup>WT</sup> MEFs. MEFs are treated with conditional medium for 24 hours before fixation. (B) western shows the expression of exogenous Gli1 in SENP1<sup>-/-</sup> and SENP1<sup>WT</sup> MEFs are same. Tubulin as a loading control.

**Figure S5 Nuclear localization of different Gli1 mutants. Immunofluorescence**

assay shows the localization of different Gli1 mutants. HA-Gli1 or HA-Gli1-3KR is transfected into SENP1<sup>-/-</sup> MEFs and then treated with ShhN-conditional medium for 24 hours before fixation. Two groups are treated with LMB during the last 6 hours.

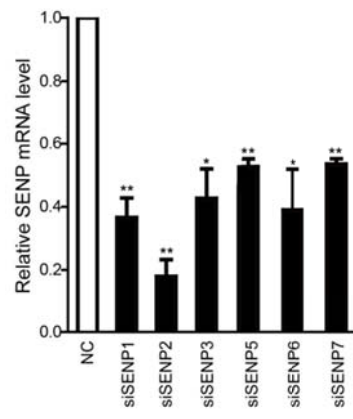

sFig.1

A

SENP1-/-  
ShhN-CM  
PLA: anti-HA/SUMO1

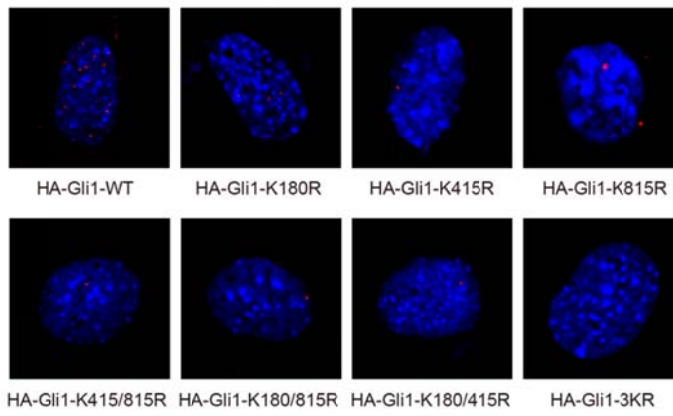

B

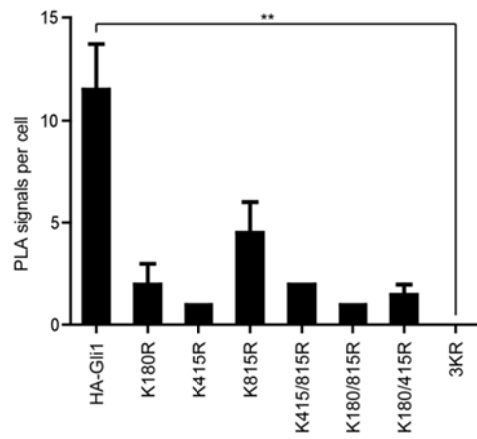

sFig.2

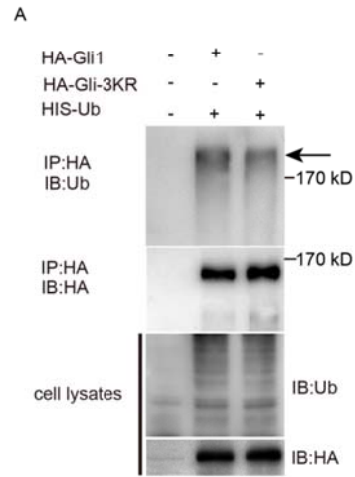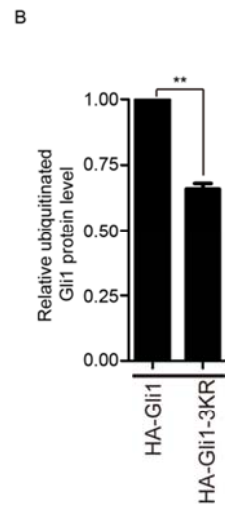

sFig.3

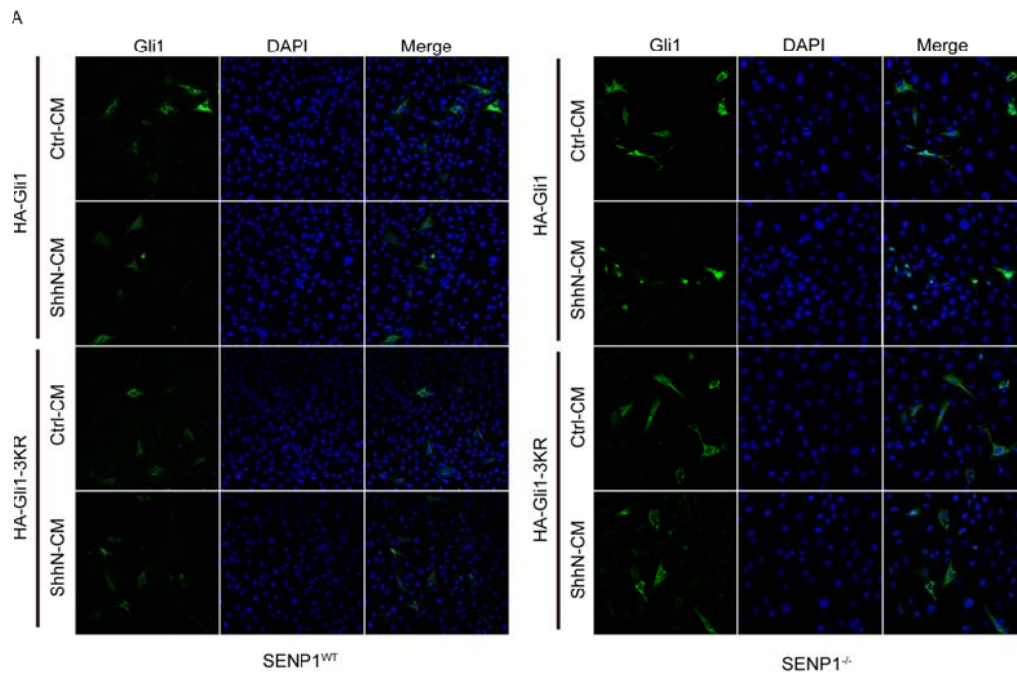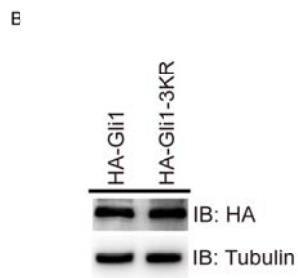

sFig.4

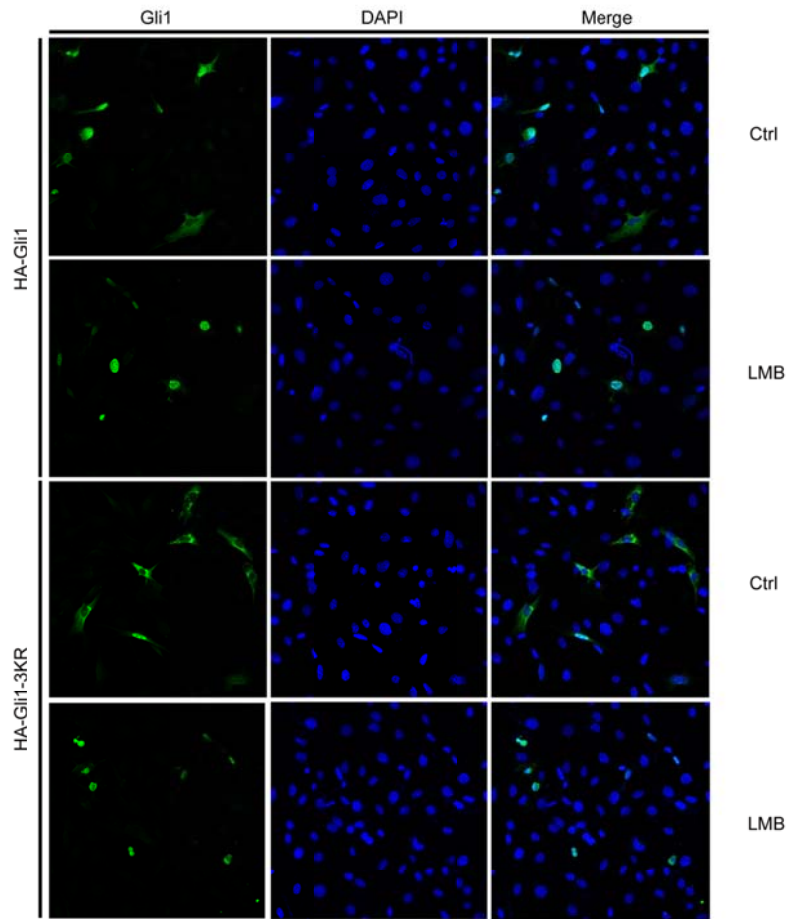

sFig.5



**sTable 1**

| gene  | organism            | Forward strain         | Reverse strain         |
|-------|---------------------|------------------------|------------------------|
| SENP1 | <i>Mus musculus</i> | GCAUUUCGCCUGACCAUUATT  | UAAUGGUCAGGCCGAAAUGCTT |
|       | <i>Mus musculus</i> | GGAAGUGACUGUGGGAUGUTT  | ACAUCCACAGUCACUUCCTT   |
| SENP2 | <i>Mus musculus</i> | GGACAAACCUAUCACAUUUTT  | AAAUGUGAUAGGUUUGUCCTT  |
|       | <i>Mus musculus</i> | GGUAAUAAAUCUCCUAAUGTT  | CAUUAGGAGAUUUUUAUACCTT |
| SENP3 | <i>Mus musculus</i> | ACGAAUUCUUAACAAACGUATT | UACGUUUGAAGGAAUUCGUTT  |
|       | <i>Mus musculus</i> | GCACUGAUGAGGUAGUAGATT  | UCUACUACCUCAUCAGUGCTT  |
| SENP5 | <i>Mus musculus</i> | GUACAGAGCUGAUUCAUGATT  | UCAUGAAUCAGCUCUGUACTT  |
|       | <i>Mus musculus</i> | GAGGAAAGGAAUCCACUATT   | UAAGUGGAUCCUUCUUCTT    |
| SENP6 | <i>Mus musculus</i> | GAAAGUGACCCUCGUUAUATT  | UAUAACGAGGGUCACUUCTT   |
|       | <i>Mus musculus</i> | GGACAAAUCUGCUCAGUGUTT  | ACACUGAGCAGAUUUGUCCTT  |
| SENP7 | <i>Mus musculus</i> | CAAAGUACCGAGUCGAAUATT  | UAUUCGACUCGGUACUUUGTT  |
|       | <i>Mus musculus</i> | GAUAAUGAUCUACGUACUATT  | UAGUACGUAGAUCAUUAUUCTT |

**sTable 2**

| gene           | organisms           | 5'-primer              | 3'-primer              |
|----------------|---------------------|------------------------|------------------------|
| HPRT           | <i>Mus musculus</i> | TACAGGCCAGACTTTGTTGG   | AACTTGCGCTCATCTTAGGC   |
| Gli1           | <i>Mus musculus</i> | GGTCTCGGGGTCTCAAAGTCTG | TGTAGTGCTGAGCAGGTGTG   |
| SENP1          | <i>Mus musculus</i> | ACCTTTGTGGGCAAGTCCAA   | GGACTTGGGGCAGGCTTAAT   |
| SENP2          | <i>Mus musculus</i> | CAGAAGAAGTGTCTGCCCGA   | AAGAGGTCTTCCGTTCTTCTG  |
| SENP3          | <i>Mus musculus</i> | ATGTGTGCAGCATTGGAGACCA | AGGGATGAGGCTGCCATAAGTT |
| SENP5          | <i>Mus musculus</i> | TGACCAGCAGAATGGCTGTGTT | TCATCGCTGACAGCACTTGT   |
| SENP6          | <i>Mus musculus</i> | TCAGGCAGAGGTGGTCTTTGAA | TTGCGCGCAGTTTCCTTTGA   |
| SENP7          | <i>Mus musculus</i> | AAGTCAGTGTCTCAGCCCTCAA | TTACTCCCAAGCCTCCCTTAGT |
| $\beta$ -actin | <i>Homo sapiens</i> | CATCGAGCACGGCATCGTCA   | TAGCACAGCCTGGATAGCAAC  |
| Gli1           | <i>Homo sapiens</i> | AGCTAGAGTCCAGAGGTTCAA  | TAGACAGAGGTTGGGAGGTAAG |
| SENP1          | <i>Homo sapiens</i> | TACGACTCCATGGGTGGGAT   | GCTGAGGAATCTCCTGGCTT   |
| SENP2          | <i>Homo sapiens</i> | TTCCCATTCAGCTGACCAC    | CCAGAACCTGTCAGTTCACAA  |
